# Supplementary material for: Ru-decorated knitted Co3O4nanowires as a robust carbon/binder-free catalytic cathode for lithium–oxygen batteries
Source: Royal Society of Chemistry journal article supplement (doi:10.1039/c6nj01364c), 2016-01-01
Supplement: c6nj01364c1.pdf [file c6nj01364c1.pdf]

## Supporting Information

### Ru-decorated knitted $\text{Co}_3\text{O}_4$ nanowires as robust carbon/binder-free catalytic cathode for lithium-oxygen batteries

Liliang Huang,<sup>a</sup> Yangjun Mao,<sup>a</sup> Guoqing Wang,<sup>a</sup> Xueke Xia,<sup>a</sup> Jian Xie,<sup>\*ab</sup> Shichao Zhang,<sup>c</sup> Gaohui  
Du,<sup>d</sup> Gaoshao Cao<sup>b</sup> and Xinbing Zhao<sup>ab</sup>

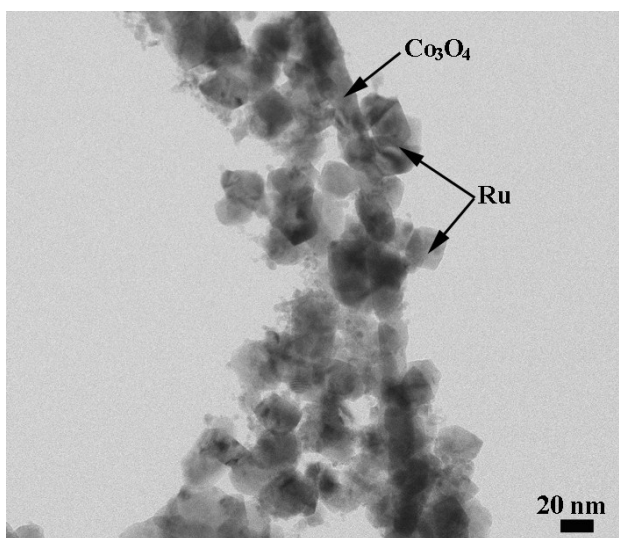

**Fig. S1** High-magnification TEM of  $\text{Co}_3\text{O}_4/\text{Ru}$ .

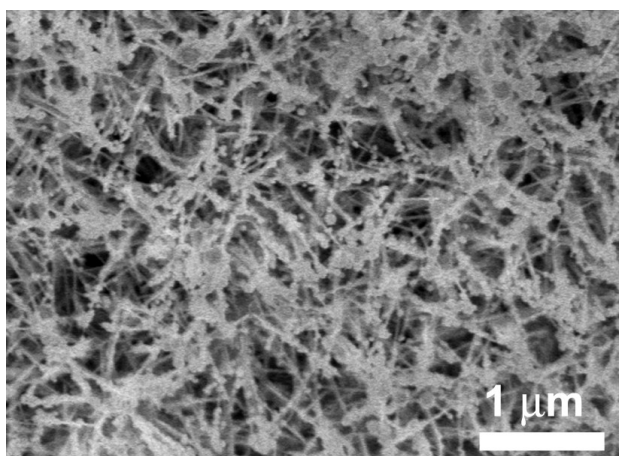

**Fig. S2** SEM image of  $\text{Co}_3\text{O}_4/\text{Pd}$ .

\*E-mail: xiejian1977@zju.edu.cn

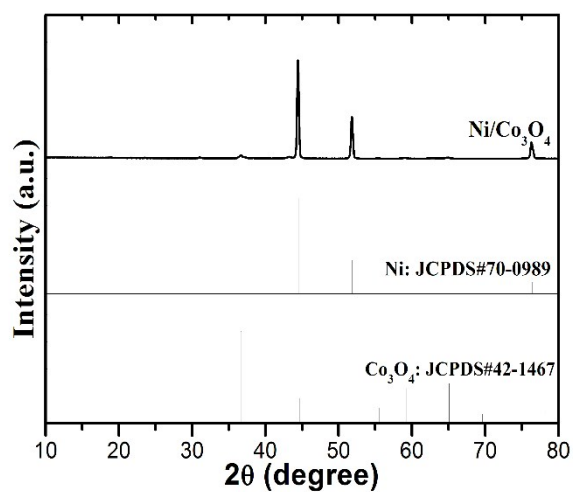

Fig. S3 XRD patterns of  $\text{Co}_3\text{O}_4/\text{Ru}$  electrode after charge.

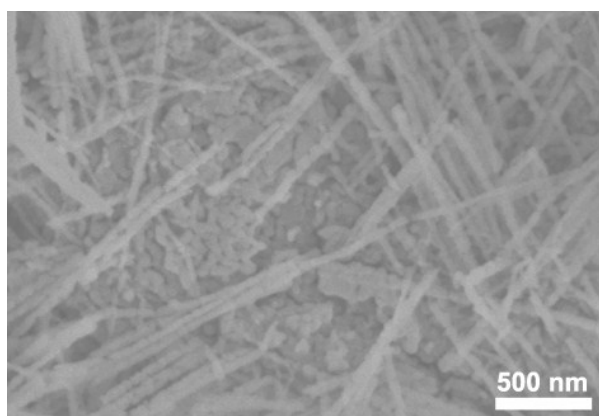

Fig. S4 SEM image of the  $\text{Co}_3\text{O}_4/\text{Ru}$  cathode after repeated cycling with a limited capacity of  $500 \text{ mAh g}^{-1}$ .

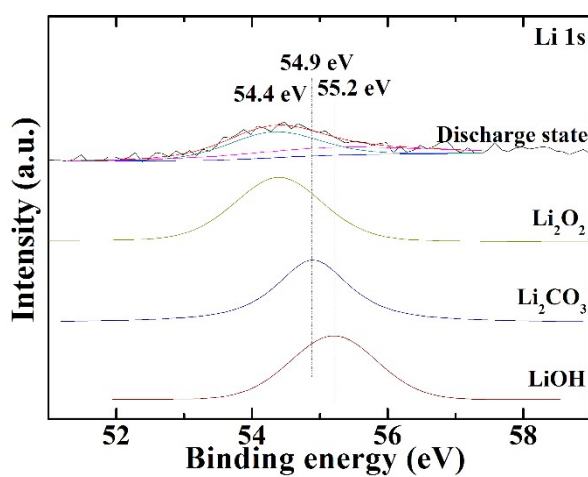

Fig. S5 XPS of the discharged electrode after repeated cycling with a limited capacity of  $500 \text{ mAh g}^{-1}$ .
